# Supplementary material for: Bioinformatic Analysis of Sulfotransferases from an Unexplored Gut Microbe, Sutterella wadsworthensis 3_1_45B: Possible Roles towards Detoxification via Sulfonation by Members of the Human Gut Microbiome
Source: MDPI journal article supplement (doi:10.3390/ijms25052983), 2024-03-04
Supplement: s1 [file s1]

**S2 Table. Annotated asst genes in the genus *Sutterella*.**

| <b><i>Sutterella</i> Species and Strain</b> | <b># of Annotated asst Genes</b> |
|---------------------------------------------|----------------------------------|
| <i>Sutterella wadsworthensis</i> 3_1_45B    | 17                               |
| <i>Sutterella wadsworthensis</i> DSM 14016  | 15                               |
| <i>Sutterella wadsworthensis</i> HGA0222    | 15                               |
| <i>Sutterella megalosphaeroides</i> 6FBBBH3 | 11                               |
| <i>Sutterella</i> sp. KLE1602               | 11                               |
| <i>Sutterella massiliensis</i> An829        | 10                               |
| <i>Sutterella seckii</i> ASD393             | 10                               |
| <i>Sutterella wadsworthensis</i> 2_1_59BFAA | 8                                |
| <i>Sutterella faecalis</i> KGMB03119        | 7                                |
| <i>Sutterella seckii</i> ASD3426            | 7                                |
| <i>Sutterella</i> sp. KCTC 15688            | 6                                |
| <i>Sutterella parvirubra</i> YIT 11816      | 5                                |
| <i>Sutterella</i> sp. AM11-39               | 2                                |
| <i>Sutterella</i> sp. AF15-44LB             | 1                                |
| <i>Sutterella</i> sp. AF15-45LB             | 1                                |
| <i>Sutterella</i> sp. AM18-8-1              | 1                                |
| <i>Sutterella morbirenis</i>                | 0                                |
| <i>Sutterella sanguinus</i>                 | 0                                |
| <i>Sutterella stercoricanis</i>             | 0                                |
| <i>Sutterella timonensis</i>                | 0                                |

Table depicts information shown in Figure 3. Number of annotated ASSTs for each species and strain are shown. *Sutterella wadsworthensis* 3\_1\_45B has the greatest with 17 ASSTs, while *Sutterella morbirenis*, *Sutterella sanguinus*, *Sutterella stercoricanis*, and *Sutterella timonensis* have zero.
