# Supplementary material for: Bioinformatic Analysis of Sulfotransferases from an Unexplored Gut Microbe, Sutterella wadsworthensis 3_1_45B: Possible Roles towards Detoxification via Sulfonation by Members of the Human Gut Microbiome
Source: MDPI journal article supplement (doi:10.3390/ijms25052983), 2024-03-04
Supplement: s1 [file s1]

**S3 Table. *S. wadsworthensis* 3\_1\_45B aryl-sulfate sulfotransferase information.**

| Annotated Gene | Gene ID   | Locus Tag        | %GC | Predicted Protein | Length (AA) | Signal Peptide Length (AA) | Signal Peptide Type | Trans-membrane Region |
|----------------|-----------|------------------|-----|-------------------|-------------|----------------------------|---------------------|-----------------------|
| <i>asst1</i>   | 650086806 | HMPREF9464_00020 | 59  | SwASST1           | 608         | 26                         | TAT                 | Yes                   |
| <i>asst2</i>   | 650089201 | HMPREF9464_02348 | 61  | SwASST2           | 609         | 22                         | Sec                 | No                    |
| <i>asst3</i>   | 650088873 | HMPREF9464_02031 | 55  | SwASST3           | 606         | 33                         | TAT                 | No                    |
| <i>asst4</i>   | 650088620 | HMPREF9464_01783 | 55  | SwASST4           | 615         | 32                         | Sec                 | Yes                   |
| <i>asst5</i>   | 650088457 | HMPREF9464_01628 | 55  | SwASST5           | 614         | 31                         | TAT                 | No                    |
| <i>asst6</i>   | 650088274 | HMPREF9464_01448 | 49  | SwASST6           | 612         | 25                         | TAT                 | No                    |
| <i>asst7</i>   | 650088224 | HMPREF9464_01399 | 55  | SwASST7           | 610         | 27                         | Sec                 | Yes                   |
| <i>asst8</i>   | 650087927 | HMPREF9464_01116 | 54  | SwASST8           | 605         | 20                         | Sec                 | Yes                   |
| <i>asst9</i>   | 650087562 | HMPREF9464_00769 | 54  | SwASST9           | 613         | 29                         | Sec                 | Yes                   |
| <i>asst10</i>  | 650087393 | HMPREF9464_00601 | 50  | SwASST10          | 607         | 24                         | Sec                 | No                    |
| <i>asst11</i>  | 650087285 | HMPREF9464_00493 | 49  | SwASST11          | 449         | -                          | -                   | No                    |
| <i>asst12</i>  | 650086997 | HMPREF9464_00211 | 57  | SwASST12          | 608         | 28                         | Sec                 | Yes                   |
| <i>asst13</i>  | 650086849 | HMPREF9464_00063 | 56  | SwASST13          | 608         | 23                         | Sec                 | No                    |
| <i>asst14</i>  | 650087646 | HMPREF9464_00851 | 58  | SwASST14          | 608         | 25                         | TAT                 | Yes                   |
| <i>asst15</i>  | 650088356 | HMPREF9464_01527 | 56  | SwASST15          | 608         | 26                         | Sec                 | Yes                   |
| <i>asst16</i>  | 650086913 | HMPREF9464_00127 | 60  | SwASST16          | 607         | 23                         | TAT                 | No                    |
| <i>asst17</i>  | 650086936 | HMPREF9464_00150 | 57  | SwASST17          | 606         | 25                         | Sec                 | Yes                   |

For each annotated gene, there is a gene ID, locus tag, and information that is presented visually earlier.
