# Supplementary material for: Bioinformatic Analysis of Sulfotransferases from an Unexplored Gut Microbe, Sutterella wadsworthensis 3_1_45B: Possible Roles towards Detoxification via Sulfonation by Members of the Human Gut Microbiome
Source: MDPI journal article supplement (doi:10.3390/ijms25052983), 2024-03-04
Supplement: s1 [file s1]

**S1 Table. Human sulfotransferases and common substrates.**

| <b>Protein</b> | <b>Length<br/>(#AAs)</b> | <b>Main Substrate/Compound Utilized</b>                                     | <b>UniProt ID</b> |
|----------------|--------------------------|-----------------------------------------------------------------------------|-------------------|
| SULT1A1        | 295                      | wide variety of acceptor molecules that have a hydroxyl or an amine group   | P50225            |
| SULT1A2        | 295                      | catecholamines, phenolic drugs and neurotransmitters                        | P50226            |
| SULT1A3        | 295                      | phenolic monoamines, and phenolic and catechol drugs                        | P0DMM9            |
| SULT1A4        | 295                      | phenolic monoamines, and phenolic and catechol drugs.                       | P0DMN0            |
| SULT1B1        | 296                      | dopamine, small phenols, and thyroid hormones                               | O43704            |
| SULT1C2        | 296                      | p-nitrophenol, and the carcinogenic N-Hydroxy-2-acetylaminofluorene         | O00338            |
| SULT1C3a       | 304                      | hydroxyl-chlorinated biphenyls                                              | Q6IMI6            |
| SULT1C3d       | 304                      | bile acids, thyroid hormones, and xenobiotic compounds                      | Q6IMI6            |
| SULT1C4        | 302                      | phenolic compounds                                                          | O75897            |
| SULT1E1        | 294                      | estradiol and estrone                                                       | P49888            |
| SULT2A1        | 285                      | Hydroxysteroids and bile acids, known for selectivity of DHEA               | Q06520            |
| SULT2B1a       | 350                      | pregnenolone                                                                |                   |
| SULT2B1b       | 365                      | cholesterol                                                                 | O00204            |
| SULT4A1        | 284                      | Very low affinity for PAPS. Low catalytic activity towards common acceptors | Q9BR01            |

Shown are the amino acid length of each human sulfotransferase enzyme favored, along with favored substrates.
